# Supplementary material for: Metabolic and Functional Genomic Studies Identify Deoxythymidylate Kinase as a Target in LKB1 -Mutant Lung Cancer
Source: Oxford University Press journal article supplement (doi:10.1158/2159-8290.cd-13-0015), 2013-05-29
Supplement: 21598290cd130015-sup-107450_2_supp_0_nky4zr.xlsx [file 21598290cd130015-sup-107450_2_supp_0_nky4zr.xlsx]

## Sheet: S1.1
Table S1.1 - Top 100 shRNAs
Hairpin	Gene	# Hairpins	Hairpin ranks	Hairpin rank	# HP 500	# HP 1000	# HP 5000	# HP 10000
TRCN0000042724	Tsc2	3	24573, 26660, 1	1	1	1	1	1
TRCN0000065525	Kcnk13	4	17671, 26655, 4330, 2	2	1	1	2	2
TRCN0000042598	Cdkn2b	4	4883, 11284, 3588, 3	3	1	1	3	3
TRCN0000012089	Nfib	5	5346, 27131, 32330, 33927, 4	4	1	1	1	2
TRCN0000104023	Trmt2b	5	13091, 18857, 30595, 32469, 5	5	1	1	1	1
TRCN0000095162	Pcgf5	5	18901, 6948, 19738, 6, 22384	6	1	1	1	2
TRCN0000025401	Cmpk1	4	7805, 21438, 33733, 7	7	1	1	1	2
TRCN0000095044	E430018J23Rik	2	8, 32874	8	1	1	1	1
TRCN0000077053	Ifng	5	26405, 6934, 29781, 33241, 9	9	1	1	1	2
TRCN0000066676	Cd83	5	20018, 25899, 9010, 9232, 10	10	1	1	1	3
TRCN0000087343	LOC436441	3	24616, 6640, 11	11	1	1	1	2
TRCN0000091186	Krt26	4	28196, 30868, 12, 14882	12	1	1	1	1
TRCN0000022971	LOC329302	3	18575, 29957, 13	13	1	1	1	1
TRCN0000105531	Mup21	5	5137, 16197, 23302, 14, 33659	14	1	1	1	2
TRCN0000098846	Oplah	5	19930, 24932, 25915, 26711, 15	15	1	1	1	1
TRCN0000094444	Pcdhb15	5	32682, 9262, 16, 8485, 1670	16	1	1	2	4
TRCN0000097345	Hsh2d	5	20171, 42, 17, 3469, 1308	17	2	2	4	4
TRCN0000092488	Pdcl3	4	9302, 251, 30142, 18	18	2	2	2	3
TRCN0000066487	Tnfrsf8	5	19, 9783, 280, 5877, 5922	19	2	2	2	5
TRCN0000103560	Foxj1	5	12270, 9392, 25640, 24869, 20	20	1	1	1	2
TRCN0000042546	Rb1	6	9047, 7122, 2696, 2236, 21, 971	21	1	2	4	6
TRCN0000012563	Bmi1	4	10014, 19712, 11148, 22	22	1	1	1	1
TRCN0000070416	Hoxd12	5	17899, 23, 26599, 21756, 29892	23	1	1	1	1
TRCN0000094702	Pcdha2	4	27780, 24, 30160, 32030	24	1	1	1	1
TRCN0000088149	Cdc16	5	16735, 31994, 7452, 31454, 25	25	1	1	1	2
TRCN0000025435	Dgki	5	354, 31017, 2028, 26, 34166	26	2	2	3	3
TRCN0000103628	Hcls1	4	9297, 15681, 30131, 27	27	1	1	1	2
TRCN0000041007	Pja2	3	28, 29526, 3026	28	1	1	2	2
TRCN0000077588	Rasgrf1	2	18016, 29	29	1	1	1	1
TRCN0000091867	Arpm1	4	15384, 29362, 29332, 30	30	1	1	1	1
TRCN0000022987	Cdk13	5	5591, 4242, 22081, 31, 1173	31	1	1	3	4
TRCN0000055266	Hnrnpa1	5	486, 31915, 33099, 24020, 32	32	2	2	2	2
TRCN0000101337	Fabp9	4	23270, 416, 32119, 33	33	2	2	2	2
TRCN0000092233	LOC432889	5	11274, 9799, 20792, 34, 30456	34	1	1	1	2
TRCN0000091224	Grid2ip	4	14756, 16364, 16110, 35	35	1	1	1	1
TRCN0000079507	Slc35d1	4	20923, 9933, 3700, 36	36	1	1	2	3
TRCN0000023870	Riok3	4	7509, 30818, 33652, 37	37	1	1	1	2
TRCN0000099729	Zfp292	5	38, 30015, 4872, 1667, 2634	38	1	1	4	4
TRCN0000089883	Tuba3b	4	12199, 16436, 22234, 39	39	1	1	1	1
TRCN0000071307	Terf2	5	27110, 27310, 40, 15699, 338	40	2	2	2	2
TRCN0000097348	Hsh2d	5	20171, 42, 17, 3469, 1308	41	2	2	4	4
TRCN0000030910	Usp54	9	9399, 4804, 23756, 22698, 27128, 29817, 43, 32216, 3131	42	1	1	3	4
TRCN0000071317	Adar	4	25676, 44, 31960, 2301	43	1	1	2	2
TRCN0000086359	Zfat	5	34131, 1445, 208, 34245, 45	44	2	2	3	3
TRCN0000030435	Olfr1256	4	7266, 2389, 18465, 46	45	1	1	2	3
TRCN0000041829	Pdhb	4	12474, 5193, 14721, 47	46	1	1	1	2
TRCN0000040972	Zswim2	3	27141, 48, 33882	47	1	1	1	1
TRCN0000023516	Ntrk3	2	8462, 49	48	1	1	1	2
TRCN0000091007	4732456N10Rik	4	21340, 24037, 17584, 50	49	1	1	1	1
TRCN0000081987	Nfe2	5	27993, 31616, 28479, 51, 1154	50	1	1	2	2
TRCN0000094496	Pcdhb12	5	20116, 23619, 12824, 52, 13293	51	1	1	1	1
TRCN0000040725	Rnf146	5	1793, 3390, 3763, 6435, 53	52	1	1	4	5
TRCN0000066222	Ifna2	5	10320, 26687, 26956, 5617, 55	53	1	1	1	2
TRCN0000094712	Tspan33	2	31106, 56	54	1	1	1	1
TRCN0000012739	Nedd8	3	9680, 57, 6779	55	1	1	1	3
TRCN0000094729	Cdh4	5	11343, 4937, 29012, 58, 33201	56	1	1	2	2
TRCN0000012006	Fstl1	5	7250, 32604, 59, 33219, 34170	57	1	1	1	2
TRCN0000102470	Pspc1	2	29066, 60	58	1	1	1	1
TRCN0000086895	H60a	5	21073, 19729, 27589, 61, 2481	59	1	1	2	2
TRCN0000024355	Tssk1	4	7660, 24712, 32333, 62	60	1	1	1	2
TRCN0000040745	Znrf1	3	21577, 33153, 63	61	1	1	1	1
TRCN0000040629	Usp24	4	22191, 17559, 19572, 64	62	1	1	1	1
TRCN0000096130	Zfp85-rs1	5	1114, 65, 1628, 25701, 31608	63	1	1	3	3
TRCN0000102700	Rhoh	5	8007, 18501, 23532, 30830, 66	64	1	1	1	2
TRCN0000025391	LOC381757	4	18804, 20444, 67, 1552	65	1	1	2	2
TRCN0000091053	Kiss1	4	12472, 68, 28452, 21892	66	1	1	1	1
TRCN0000022560	Map3k7	4	20793, 69, 29059, 32638	67	1	1	1	1
TRCN0000088943	Mgp	4	4736, 2776, 70, 28075	68	1	1	3	3
TRCN0000099162	Cbr4	4	22070, 4013, 21153, 71	69	1	1	2	2
TRCN0000065794	Clec2g	4	24674, 72, 32680, 1459	70	1	1	2	2
TRCN0000012128	Nfe2l2	9	11732, 13344, 1687, 24782, 28676, 1684, 26365, 31232, 73	71	1	1	3	3
TRCN0000070819	Zeb1	5	13623, 12678, 29498, 3511, 74	72	1	1	2	2
TRCN0000087484	Gm6194	5	10271, 17753, 7310, 75, 29200	73	1	1	1	2
TRCN0000095311	Ppargc1a	5	13882, 337, 29127, 76, 28575	74	2	2	2	2
TRCN0000093764	Ugcg	5	16838, 77, 19225, 29226, 21994	75	1	1	1	1
TRCN0000092795	Sp100	5	15141, 29499, 78, 6450, 22526	76	1	1	1	2
TRCN0000079320	Slc15a2	4	11166, 29505, 31633, 79	77	1	1	1	1
TRCN0000104628	Gnptg	5	2376, 24944, 31636, 701, 80	78	1	2	3	3
TRCN0000095898	2610008E11Rik	5	22476, 29796, 4782, 16465, 81	79	1	1	2	2
TRCN0000023639	Fert2	5	82, 18572, 33682, 33372, 20045	80	1	1	1	1
TRCN0000041103	1700045I19Rik	4	12167, 14828, 83, 33957	81	1	1	1	1
TRCN0000022612	Araf	6	13139, 24456, 6610, 3106, 32936, 84	82	1	1	2	3
TRCN0000081995	Dmbx1	3	25725, 23980, 85	83	1	1	1	1
TRCN0000022508	Tesk2	4	6591, 32055, 86, 30300	84	1	1	1	2
TRCN0000102131	Sec14l4	5	6082, 31752, 27834, 30605, 87	85	1	1	1	2
TRCN0000086619	Zkscan5	5	20736, 16621, 751, 88, 4807	86	1	2	3	3
TRCN0000079267	Slco4c1	3	8400, 30571, 89	87	1	1	1	2
TRCN0000094352	Pcdha4	3	19855, 21576, 90	88	1	1	1	1
TRCN0000103535	Kdm4b	5	14611, 7574, 30612, 11437, 91	89	1	1	1	2
TRCN0000024857	Prkar2a	5	14529, 27449, 27283, 92, 33924	90	1	1	1	1
TRCN0000012725	Crebbp	5	8296, 93, 2265, 33276, 7201	91	1	1	2	4
TRCN0000081636	Ebf4	4	12366, 15177, 33004, 94	92	1	1	1	1
TRCN0000067762	Il13ra1	5	19278, 11748, 2868, 95, 30454	93	1	1	2	2
TRCN0000071203	Ep300	5	9270, 26544, 96, 3200, 211	94	2	2	3	4
TRCN0000097295	Dvl3	3	23191, 24501, 97	95	1	1	1	1
TRCN0000028991	Pten	4	5080, 98, 7407, 481	96	2	2	2	4
TRCN0000096474	Ncor1	5	18426, 11856, 6890, 521, 99	97	1	2	2	3
TRCN0000024616	Dtymk	4	5740, 22800, 21302, 100	98	1	1	1	2
TRCN0000037275	Rnf31	4	4505, 17491, 101, 32573	99	1	1	2	2
TRCN0000030486	Ren1	4	9911, 3960, 102, 7590	100	1	1	2	4
